# Supplementary material for: Time-Course Responses of Apple Leaf Endophytes to the Infection of Gymnosporangium yamadae
Source: MDPI journal article supplement (doi:10.3390/jof10020128), 2024-02-03

**Table S1. Annotation of all sequences in all samples at various taxonomic levels and ASVs.**

| Sample   | Kingdom | Phylum | Class | Order | Family | Genus | Species | OTU   |
|----------|---------|--------|-------|-------|--------|-------|---------|-------|
| bacteria | 1       | 37     | 98    | 160   | 261    | 551   | 376     | 10152 |
| fungi    | 1       | 4      | 12    | 26    | 42     | 43    | 29      | 4123  |

**Table S2. Low abundance taxa at the bacterial phylum level in each sampling point (ranked 20th and beyond in terms of abundance among all taxa).**

| Phylum            | diseased_6h | diseased_24h | diseased_3d | diseased_5d | diseased_11d | diseased_14d | diseased_20d | diseased_70d | diseased_90d |
|-------------------|-------------|--------------|-------------|-------------|--------------|--------------|--------------|--------------|--------------|
| Chloroflexi       | 0.001847328 | 7.92E-05     | 0           | 8.86E-05    | 0.000956111  | 0.022474754  | 0.010706722  | 0.00030698   | 0.000903586  |
| Bdellovibrionota  | 0.001423408 | 8.97E-05     | 0.00021824  | 0.000408523 | 0.000198707  | 0.00150949   | 0.002047527  | 0.00122637   | 0.004152385  |
| Myxococcota       | 0.000875509 | 0.000176453  | 0.00050126  | 0.000183456 | 0.000187155  | 0.0046654    | 0.003299577  | 0.002065139  | 0.000722768  |
| Desulfobacterota  | 0.000816367 | 0            | 0.00014298  | 0.000294641 | 0.000125154  | 0.007999244  | 0.004134508  | 0.000659916  | 0            |
| Deinococcota      | 0.000941672 | 5.48E-05     | 3.01E-05    | 0.000412012 | 0.000120768  | 0.000206709  | 0.000569523  | 0.002712669  | 0.005517733  |
| Armatimonadota    | 0.000132639 | 2.96E-05     | 0           | 0.000262727 | 9.02E-05     | 0.00026734   | 0.000119772  | 0.00016769   | 0.004441327  |
| Verrucomicrobiota | 0.000647924 | 1.76E-05     | 0.00013544  | 0.000172337 | 0.000233673  | 0.004668615  | 0.003854182  | 0.000302018  | 0            |
| Gemmatimonadota   | 0.000162227 | 0            | 0.00011461  | 1.36E-05    | 0.000179544  | 0.006437728  | 0.002247704  | 0.000144357  | 4.56E-05     |
| Abditibacteriota  | 0           | 0            | 0           | 0.000265008 | 0            | 0.000206214  | 0.000248099  | 0.000761593  | 0.007706625  |
| Nitrospirota      | 0.000185283 | 0.000121142  | 0           | 0           | 0.000167395  | 0.003398942  | 0.003336911  | 0.000461437  | 0.000106341  |
| Planctomycetota   | 0.000173491 | 0.000149694  | 0           | 0           | 0.000184721  | 0.002640515  | 0.001149031  | 0.000598049  | 0            |
| Dependentiae      | 7.30E-05    | 0            | 0.00027841  | 0           | 0            | 0.001311843  | 0            | 0            | 4.19E-05     |
| Fusobacteriota    | 0.000212044 | 0            | 4.31E-05    | 0           | 0            | 0.000672988  | 0.000136882  | 0.000134259  | 0            |
| Elusimicrobiota   | 7.42E-05    | 0            | 6.16E-05    | 0.000216811 | 0            | 0.000412429  | 0.001121604  | 0.00052613   | 7.52E-05     |
| NB1_j             | 2.10E-05    | 1.48E-05     | 0.00014981  | 0           | 0            | 0.000472356  | 0.000767226  | 9.17E-05     | 5.24E-05     |
| Other             | 0.002059552 | 0.000670499  | 0.00028391  | 0.000177301 | 0.000345381  | 0.007332592  | 0.006029252  | 0.000424055  | 4.66E-05     |

| Phylum           | healthy_6h  | healthy_24h | healthy_3d | healthy_5d  | healthy_11d | healthy_14d | healthy_20d | healthy_70d | healthy_90d |
|------------------|-------------|-------------|------------|-------------|-------------|-------------|-------------|-------------|-------------|
| Chloroflexi      | 0           | 0.001227172 | 0.00232728 | 0.001191956 | 0.000104552 | 0.00053184  | 0.00156522  | 0.012518753 | 0.000344525 |
| Bdellovibrionota | 0.002797073 | 0.00279135  | 0.00125571 | 0.001189554 | 0.002305952 | 0.001126752 | 0.000545918 | 0.002363565 | 0.005419279 |
| Myxococcota      | 0.000974259 | 0.000864432 | 0.00294246 | 0.000745036 | 0.002203031 | 0.000886609 | 0.00103496  | 0.003291598 | 0.003931118 |
| Desulfobacterota | 0.000317788 | 0.000452309 | 0.00055393 | 0.00012848  | 0.000510263 | 0.000785498 | 0.00040599  | 0.004112245 | 7.97E-05    |
| Deinococcota     | 0.001664372 | 0.000269592 | 0.00023312 | 0.000415346 | 0.000133156 | 5.53E-05    | 0.002441331 | 0.000353581 | 0.002527446 |

|                   |             |             |            |             |             |             |             |             |             |
|-------------------|-------------|-------------|------------|-------------|-------------|-------------|-------------|-------------|-------------|
| Armatimonadota    | 0.00218155  | 0.000142794 | 6.17E-05   | 0.007105436 | 0           | 0.000210821 | 0           | 0.000680093 | 0.001367487 |
| Verrucomicrobiota | 0.000806395 | 0.000178992 | 0          | 0           | 0.000628558 | 0.000809187 | 0.001455958 | 0.001463867 | 0.000185908 |
| Gemmatimonadota   | 0.000101128 | 0.000383618 | 0.00068134 | 0.000143317 | 1.12E-05    | 0.000816387 | 0           | 0.002358205 | 6.89E-05    |
| Abditibacteriota  | 0           | 0.000119947 | 0          | 0.001673012 | 0           | 0.001122742 | 0           | 0           | 0.001186271 |
| Nitrospirota      | 0.001647446 | 0.000271839 | 0          | 0           | 0.00034662  | 0           | 0.001026915 | 0.000120034 | 0           |
| Planctomycetota   | 0.000144469 | 0.000271985 | 0.0013948  | 0           | 0           | 0           | 0.000150908 | 0.000271214 | 0.00050238  |
| Dependentiae      | 0.000330994 | 0.000295464 | 0.00070998 | 0           | 0.001335072 | 0           | 0.000669292 | 0           | 0           |
| Fusobacteriota    | 0.00046291  | 7.89E-05    | 0.00014903 | 0.000407285 | 0.000147635 | 0.001043643 | 0.000283162 | 0           | 0           |
| Elusimicrobiota   | 6.02E-05    | 0.000176965 | 0.00060542 | 0           | 0           | 0           | 0.000193065 | 0.000474978 | 0           |
| NB1_j             | 0           | 0.000256463 | 0          | 0           | 0.000464969 | 0           | 0.000271635 | 0.000948945 | 0           |
| Other             | 0.001149294 | 0.001301437 | 0.00024068 | 0.000634199 | 0.000636018 | 0           | 0.00053894  | 0.002725284 | 8.86E-05    |

**Table S3. Low abundance taxa at the bacterial class level in each sampling point (ranked 20th and beyond in terms of abundance among all taxa).**

| Class            | diseased_6h | diseased_24h | diseased_3d | diseased_5d | diseased_11d | diseased_14d | diseased_20d | diseased_70d | diseased_90d |
|------------------|-------------|--------------|-------------|-------------|--------------|--------------|--------------|--------------|--------------|
| Bacteroidia      | 0.01864567  | 0.01025847   | 0.00608732  | 0.00795762  | 0.0208291    | 0.06405695   | 0.06573949   | 0.01690357   | 0.02040729   |
| Thermoleophilia  | 0.00224116  | 0.00033422   | 0.00307307  | 0.00178269  | 0.00145125   | 0.03367159   | 0.01469781   | 0.0033328    | 0.00244854   |
| Acidobacteriae   | 0.00090534  | 0.00054567   | 0.00110664  | 0.00046698  | 0.00049876   | 0.01115474   | 0.00467069   | 0.0038426    | 0.00051146   |
| Acidimicrobiia   | 0.00012819  | 6.23E-05     | 0.00083163  | 0.00013715  | 0.00010024   | 0.01028707   | 0.00454476   | 0.00045809   | 0.00017053   |
| Bdellovibrionia  | 0.00096366  | 6.23E-05     | 8.28E-05    | 0.00021347  | 7.02E-05     | 0.0008661    | 0.00111362   | 0.00119478   | 0.00353312   |
| Polyangia        | 0.00076327  | 0.00015884   | 0.00026902  | 0.00015566  | 0.00013704   | 0.0033411    | 0.00259252   | 0.00095718   | 0.00027462   |
| AD3              | 0           | 0            | 0           | 0           | 5.01E-05     | 0.00900325   | 0.00545299   | 0            | 0            |
| Deinococci       | 0.00094167  | 5.48E-05     | 3.01E-05    | 0.00041201  | 0.00012077   | 0.00020671   | 0.00056952   | 0.00271267   | 0.00551773   |
| Fimbriimonadia   | 0.00013264  | 2.96E-05     | 0           | 0.00026273  | 9.02E-05     | 0.00026734   | 0.00011977   | 0.00016769   | 0.00410711   |
| MB_A2_108        | 0           | 2.96E-05     | 0.00016214  | 0           | 0.00027279   | 0.00351208   | 0.00561934   | 0            | 0            |
| Limnochordia     | 0           | 0            | 0           | 0           | 0.00037088   | 0.00563505   | 0.00759239   | 0            | 0            |
| TK10             | 0           | 0            | 0           | 0           | 8.02E-05     | 0.00415309   | 0.00216775   | 0            | 0.00010485   |
| Gemmatimonadetes | 0.00013669  | 0            | 6.38E-05    | 1.36E-05    | 0.00014947   | 0.00619244   | 0.00200108   | 0.00014436   | 0            |
| Abditibacteria   | 0           | 0            | 0           | 0.00026501  | 0            | 0.00020621   | 0.0002481    | 0.00076159   | 0.00770663   |
| unclassified     | 0.00075957  | 0.00018453   | 0           | 0           | 0            | 0.0008865    | 0.00202546   | 0.00043994   | 0.00353765   |
| Other            | 0.00963474  | 0.00184514   | 0.00231822  | 0.00170905  | 0.00277583   | 0.05118783   | 0.03235216   | 0.00628924   | 0.00291553   |

| Class           | healthy_6h | healthy_24h | healthy_3d | healthy_5d | healthy_11d | healthy_14d | healthy_20d | healthy_70d | healthy_90d |
|-----------------|------------|-------------|------------|------------|-------------|-------------|-------------|-------------|-------------|
| Bacteroidia     | 0.03533521 | 0.03826801  | 0.03673052 | 0.01390706 | 0.02181452  | 0.03562631  | 0.0588622   | 0.04827124  | 0.05024898  |
| Thermoleophilia | 0.00467204 | 0.00449386  | 0.00374468 | 0.00808934 | 0.00118318  | 0.00401224  | 0.00371092  | 0.01681338  | 0.00042995  |
| Acidobacteriae  | 0.00346688 | 0.00118795  | 0.00532147 | 0.00074287 | 0.00141542  | 0.00232793  | 0.00324489  | 0.00909536  | 0.00122928  |
| Acidimicrobiia  | 0.00090992 | 0.00124456  | 0.00019806 | 0.00059541 | 0.00102683  | 0.00152927  | 0.00039485  | 0.00682691  | 0.00059933  |
| Bdellovibrionia | 0.00237751 | 0.00251063  | 0.00085226 | 0.00100513 | 0.00131523  | 0.00086235  | 0.00054592  | 0.00192752  | 0.00435445  |
| Polyangia       | 0.00046272 | 0.00065101  | 0.00241622 | 0.0005975  | 0.00220303  | 0.00073967  | 0.00077226  | 0.00277049  | 0.00153165  |
| AD3             | 0          | 0           | 0          | 0          | 0           | 0           | 0           | 0.0053182   | 0           |
| Deinococci      | 0.00166437 | 0.00026959  | 0.00023312 | 0.00041535 | 0.00013316  | 5.53E-05    | 0.00244133  | 0.00035358  | 0.00252745  |

|                  |            |            |            |            |            |            |            |            |            |
|------------------|------------|------------|------------|------------|------------|------------|------------|------------|------------|
| Fimbriimonadia   | 0.00218155 | 0.00014279 | 6.17E-05   | 0.00710544 | 0          | 0.00021082 | 0          | 0.00068009 | 0.00136749 |
| MB_A2_108        | 0.0003395  | 0.00146335 | 0          | 0.00035049 | 0          | 0.0016743  | 0          | 0.00200892 | 0          |
| Limnochordia     | 0          | 0          | 0          | 0          | 0          | 0          | 0          | 0.00070079 | 0          |
| TK10             | 0          | 0.00070291 | 0.00218111 | 0.0005188  | 0          | 0.00029207 | 0          | 0.00244491 | 6.89E-05   |
| Gemmatimonadetes | 4.33E-05   | 0.00026871 | 0.00068134 | 0.00014332 | 0          | 0.0005721  | 0          | 0.00218892 | 6.89E-05   |
| Abditibacteria   | 0          | 0.00011995 | 0          | 0.00167301 | 0          | 0.00112274 | 0          | 0          | 0.00118627 |
| unclassified     | 0.00081625 | 0.00010023 | 2.09E-05   | 0          | 0.000348   | 0.0002677  | 0.00040599 | 0.00098206 | 0          |
| Other            | 0.00694707 | 0.00582844 | 0.00516027 | 0.00272639 | 0.00539086 | 0.00458926 | 0.00694975 | 0.02034713 | 0.00703531 |

**Table S4.** Low abundance taxa at the fungal    phylum level in each sampling point  
(ranked 20th and beyond in terms of abundance among all taxa).

| name              | diseased_6h | diseased_24h | diseased_3d | diseased_5d | diseased_11d | diseased_14d | diseased_20d | diseased_70d | diseased_90d |
|-------------------|-------------|--------------|-------------|-------------|--------------|--------------|--------------|--------------|--------------|
| Ascomycota        | 0.764599339 | 0.484791526  | 0.619890296 | 0.514730729 | 0.763981195  | 0.825546438  | 0.636687252  | 0.56601028   | 0.681654128  |
| Basidiomycota     | 0.006511188 | 0.014042673  | 0.009844644 | 0.011366461 | 0.013905674  | 0.00480353   | 0.011969271  | 0.002200219  | 0.003130325  |
| Mortierellomycota | 0           | 0            | 0           | 0           | 0            | 0            | 0            | 0.000392619  | 0            |
| Rozellomycota     | 0.000327577 | 0            | 0           | 0.000938764 | 0            | 0            | 0            | 0.001359802  | 0            |
| unclassified      | 0.307562765 | 0.501165801  | 0.37026506  | 0.472964046 | 0.222113131  | 0.169650032  | 0.351343477  | 0.43003708   | 0.532720909  |

| name              | healthy_6h  | healthy_24h | healthy_3d  | healthy_5d  | healthy_11d | healthy_14d | healthy_20d | healthy_70d | healthy_90d |
|-------------------|-------------|-------------|-------------|-------------|-------------|-------------|-------------|-------------|-------------|
| Ascomycota        | 0.889392732 | 0.796216466 | 0.78272912  | 0.742425317 | 0.861845954 | 0.686115383 | 0.489002504 | 0.417531354 | 0.512898576 |
| Basidiomycota     | 0.00528348  | 0.026763774 | 0.017504094 | 0.008165167 | 0.004040991 | 0.007038348 | 0.022849032 | 0.01352015  | 0.007508982 |
| Mortierellomycota | 0           | 0.000270022 | 0           | 0           | 0           | 0           | 0           | 0           | 0           |
| Rozellomycota     | 0           | 0           | 0           | 0           | 0           | 0.000967697 | 0           | 0           | 0           |
| unclassified      | 0.105323788 | 0.176749738 | 0.199766786 | 0.334933347 | 0.134113055 | 0.305878573 | 0.488148464 | 0.680375735 | 0.683134952 |

**Table S5.** Low abundance taxa at the fungal class level in each sampling point  
(ranked 20th and beyond in terms of abundance among all taxa).

| name                | diseased_6h | diseased_24h | diseased_3d | diseased_5d | diseased_11d | diseased_14d | diseased_20d | diseased_70d | diseased_90d |
|---------------------|-------------|--------------|-------------|-------------|--------------|--------------|--------------|--------------|--------------|
| Dothideomycetes     | 0.002848321 | 0.01943549   | 0.11593811  | 0.04400194  | 0.026355838  | 0.006158407  | 0.019237643  | 0.496687072  | 0.449142732  |
| Eurotiomycetes      | 0.058787657 | 0.04168089   | 0.12389434  | 0.02709832  | 0.162208072  | 0.040749906  | 0.151423254  | 0.031613569  | 0.000705419  |
| Leotiomycetes       | 0           | 0.00359988   | 0.00011819  | 0.00131204  | 0.000199866  | 0            | 0.000347737  | 0            | 0            |
| Pezizomycetes       | 0           | 1.7576E-05   | 0.00239046  | 0           | 0.001977341  | 0            | 0.001421916  | 0.001175965  | 0            |
| Saccharomycetes     | 0.001169919 | 0            | 0           | 0           | 0.001579403  | 2.88157E-05  | 0.004597685  | 0            | 4.59464E-05  |
| Sordariomycetes     | 0.003608576 | 0.00134785   | 0.02656974  | 0.03311592  | 0.003883664  | 0.004763893  | 0.02039573   | 0.009777447  | 0.010401599  |
| Agaricomycetes      | 0.00647375  | 0.00857248   | 0.00441813  | 0.00436835  | 0.01361513   | 0.001598531  | 0.010620004  | 0.002200219  | 0.00173186   |
| Cystobasidiomycetes | 0           | 0.0022497    | 0.00336951  | 0.00024873  | 0            | 0            | 0            | 0            | 9.30238E-05  |
| Malasseziomycetes   | 3.74374E-05 | 0.00016231   | 0.00052899  | 5.7045E-05  | 0.000290544  | 0.001620133  | 0.000321509  | 0            | 0            |
| Tremellomycetes     | 0           | 0.00305818   | 0.0006838   | 0           | 0            | 0            | 0.001027757  | 0            | 2.32559E-05  |
| Mortierellomycetes  | 0           | 0            | 0           | 0           | 0            | 0            | 0            | 0.000392619  | 0            |
| Rozellomycotina     | 0.000327577 | 0            | 0           | 0.00093876  | 0            | 0            | 0            | 0.001359802  | 0            |
| unclassified        | 0.926746762 | 0.91987565   | 0.72208873  | 0.8888589   | 0.789890143  | 0.945080314  | 0.790606765  | 0.456793308  | 0.537856163  |

| name                | healthy_6h  | healthy_24h | healthy_3d | healthy_5d | healthy_11d | healthy_14d | healthy_20d | healthy_70d | healthy_90d |
|---------------------|-------------|-------------|------------|------------|-------------|-------------|-------------|-------------|-------------|
| Dothideomycetes     | 0.003472178 | 0.02595918  | 0.04087869 | 0.04438286 | 0.029151206 | 0.008331235 | 0.003964312 | 0.194570851 | 0.483528556 |
| Eurotiomycetes      | 0.255794104 | 0.241981    | 0.49383528 | 0.26833957 | 0.032098955 | 0.062967283 | 0.092859585 | 0.056968022 | 0.002199817 |
| Leotiomycetes       | 0.000195972 | 0.00040234  | 0.00098594 | 0          | 0           | 0.005303312 | 0.004970021 | 0           | 0           |
| Pezizomycetes       | 0.000923559 | 0           | 0.00035067 | 0          | 0.003561019 | 0.000528413 | 0.002100875 | 0.002881958 | 7.04442E-05 |
| Saccharomycetes     | 0.000576587 | 0           | 0.00031091 | 9.2539E-05 | 0           | 0.000779643 | 0.00013733  | 0.002000263 | 8.80553E-05 |
| Sordariomycetes     | 0.004413693 | 0.00783718  | 0.00222537 | 0.008729   | 0           | 0.022805715 | 0.018874151 | 0.004362056 | 0.00453967  |
| Agaricomycetes      | 0.005217147 | 0.02611444  | 0.01509592 | 0.00210531 | 0.002553168 | 0.005908241 | 0.019486455 | 0.012322624 | 0.006823802 |
| Cystobasidiomycetes | 0           | 0           | 0          | 0.00591164 | 0           | 0           | 0           | 0           | 0           |
| Malasseziomycetes   | 6.6333E-05  | 0.00019423  | 8.0544E-05 | 3.365E-05  | 9.75622E-05 | 7.07204E-05 | 0.001522205 | 0           | 0           |
| Tremellomycetes     | 0           | 0           | 0.00186515 | 0          | 0           | 0.001059387 | 0.000908191 | 0           | 3.21897E-05 |
| Mortierellomycetes  | 0           | 0.00027002  | 0          | 0          | 0           | 0           | 0           | 0           | 0           |
| Rozellomycotina     | 0           | 0           | 0          | 0          | 0           | 0.000967697 | 0           | 0           | 0           |
| unclassified        | 0.729340428 | 0.69724161  | 0.44437153 | 0.67040543 | 0.93253809  | 0.891278354 | 0.855176875 | 0.726894225 | 0.502717466 |

**Table S6.** Unweighted-permanova data analysis was conducted for fungal  
bacterial communities in four periods. Specific evaluation parameters were shown  
in the table.

| Healthy group-bacteria |         |             |              |            |         |         |
|------------------------|---------|-------------|--------------|------------|---------|---------|
| Group 1                | Group 2 | Sample size | Permutations | pseudo-F   | p-value | q-value |
| A                      | B       | 12          | 999          | 1.19379719 | 0.146   | 0.146   |
| A                      | C       | 12          | 999          | 1.90947393 | 0.002   | 0.006   |
| A                      | D       | 12          | 999          | 2.26252768 | 0.001   | 0.006   |
| B                      | C       | 12          | 999          | 1.39293589 | 0.086   | 0.1032  |
| B                      | D       | 12          | 999          | 1.77209408 | 0.004   | 0.0075  |
| C                      | D       | 12          | 999          | 1.61386405 | 0.005   | 0.0075  |

| Diseased group-bacteria |         |             |              |            |         |         |
|-------------------------|---------|-------------|--------------|------------|---------|---------|
| Group 1                 | Group 2 | Sample size | Permutations | pseudo-F   | p-value | q-value |
| A                       | B       | 12          | 999          | 1.53413578 | 0.035   | 0.035   |
| A                       | C       | 12          | 999          | 2.23165862 | 0.018   | 0.0288  |
| A                       | D       | 12          | 999          | 1.68385656 | 0.011   | 0.0288  |
| B                       | C       | 12          | 999          | 2.2735224  | 0.023   | 0.0288  |
| B                       | D       | 12          | 999          | 1.40173125 | 0.024   | 0.0288  |
| C                       | D       | 12          | 999          | 2.39046314 | 0.008   | 0.0288  |

| Healthy group-fungi |         |             |              |            |         |         |
|---------------------|---------|-------------|--------------|------------|---------|---------|
| Group 1             | Group 2 | Sample size | Permutations | pseudo-F   | p-value | q-value |
| A                   | B       | 12          | 999          | 1.05545888 | 0.326   | 0.489   |
| A                   | C       | 12          | 999          | 0.77693211 | 0.906   | 0.906   |
| A                   | D       | 12          | 999          | 2.37783951 | 0.005   | 0.012   |
| B                   | C       | 12          | 999          | 1.00237994 | 0.421   | 0.5052  |
| B                   | D       | 12          | 999          | 2.14025578 | 0.004   | 0.012   |
| C                   | D       | 12          | 999          | 2.05297857 | 0.006   | 0.012   |

| Diseased group-fungi |         |             |              |            |         |         |
|----------------------|---------|-------------|--------------|------------|---------|---------|
| Group 1              | Group 2 | Sample size | Permutations | pseudo-F   | p-value | q-value |
| A                    | B       | 12          | 999          | 0.87567365 | 0.75    | 0.75    |
| A                    | C       | 12          | 999          | 1.56824199 | 0.002   | 0.006   |
| A                    | D       | 12          | 999          | 2.06524003 | 0.009   | 0.0135  |
| B                    | C       | 12          | 999          | 1.51759079 | 0.004   | 0.008   |
| B                    | D       | 12          | 999          | 1.70784349 | 0.015   | 0.018   |
| C                    | D       | 12          | 999          | 2.80369598 | 0.002   | 0.006   |

**Figure S1** After being infected by *Gymnosporangium Yamadae*, apple leaves undergo a series of pathological changes both at the micro and macro level ( Real shot pictures).

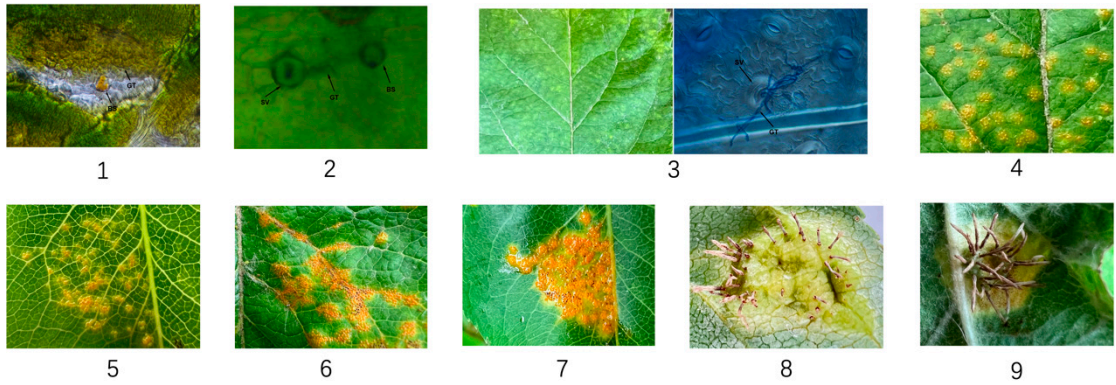

**Figure S2** Rarefaction curves based on OTUs.

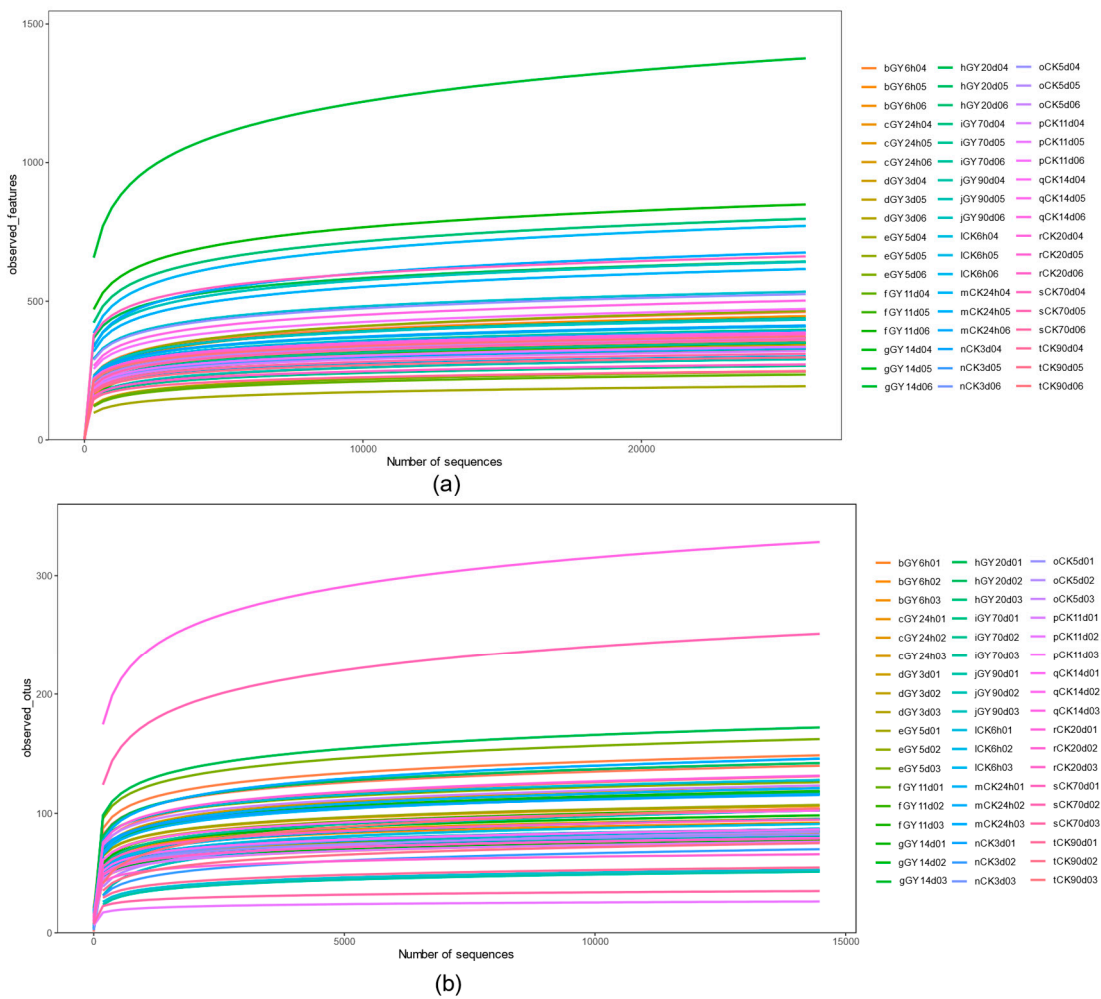

**Figure S3** Histogram of sequence annotation degree of each sample at each

classification level. The X-axis (Sample Name) represents the sample name during sequencing, and the Y-axis (Sequence Number Percent) indicates the proportion of annotated sequences at each level compared to the total annotated data. The color order of the bars from top to bottom corresponds to the color order in the legend on the right. The maximum value at each taxonomic level is 1, representing 100% of the sequences that have been annotated at least at that level.

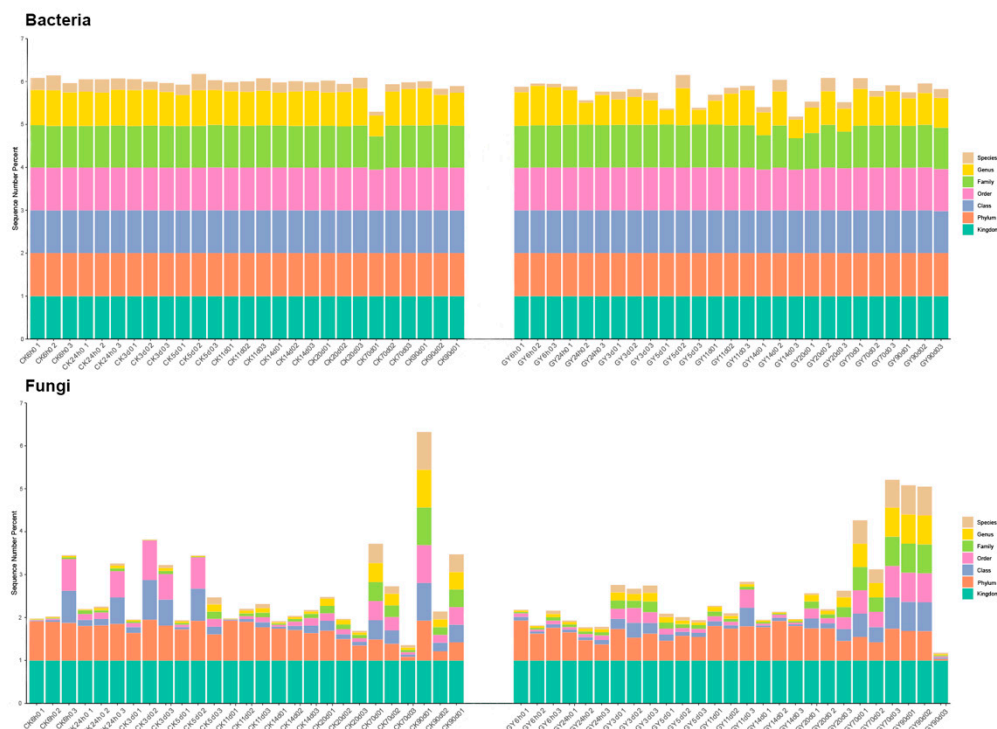

**Figure S4 Histogram of the relative distribution of diseased and healthy samples at phyla and class levels.**

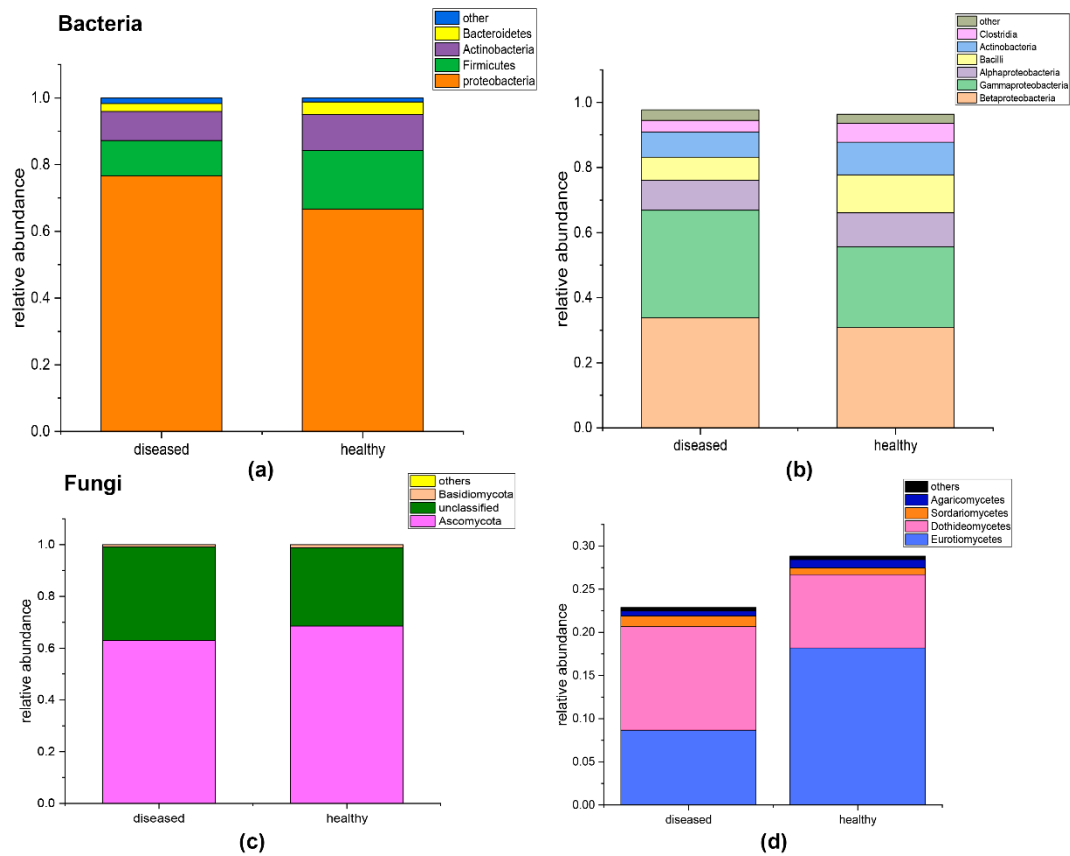

**Figure S5** Changes in alpha diversity (indicated by Shannon index) of endophytic bacteria and fungi communities in healthy apple leaves and diseased leaves at 9 stages of infection were compared. Different letters represent statistically significant differences between stages, as determined by one-way Anova with *post hoc* Tukey's HSD test ( $P < 0.05$ ). The boxplots show the estimated range between the 25th and 75th percentiles, as well as the median, minimum, and maximum values of the observed data in each dataset.

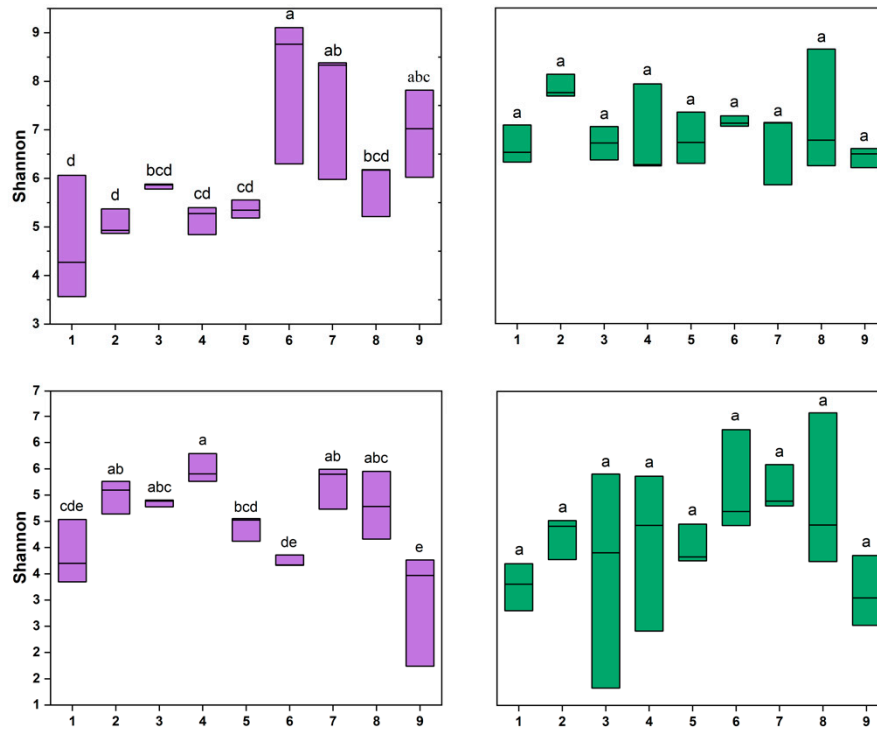

**Figure S6** Bar chart of the number of OTUs at each stage for healthy samples and disease samples.

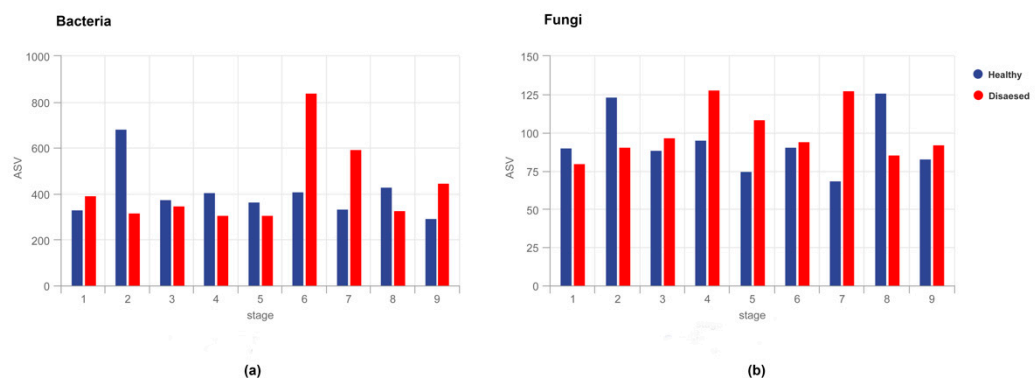

**Figure S7** Taxonomic compositions of the leaves endophytic fungal community at the order level of the diseased and healthy groups.

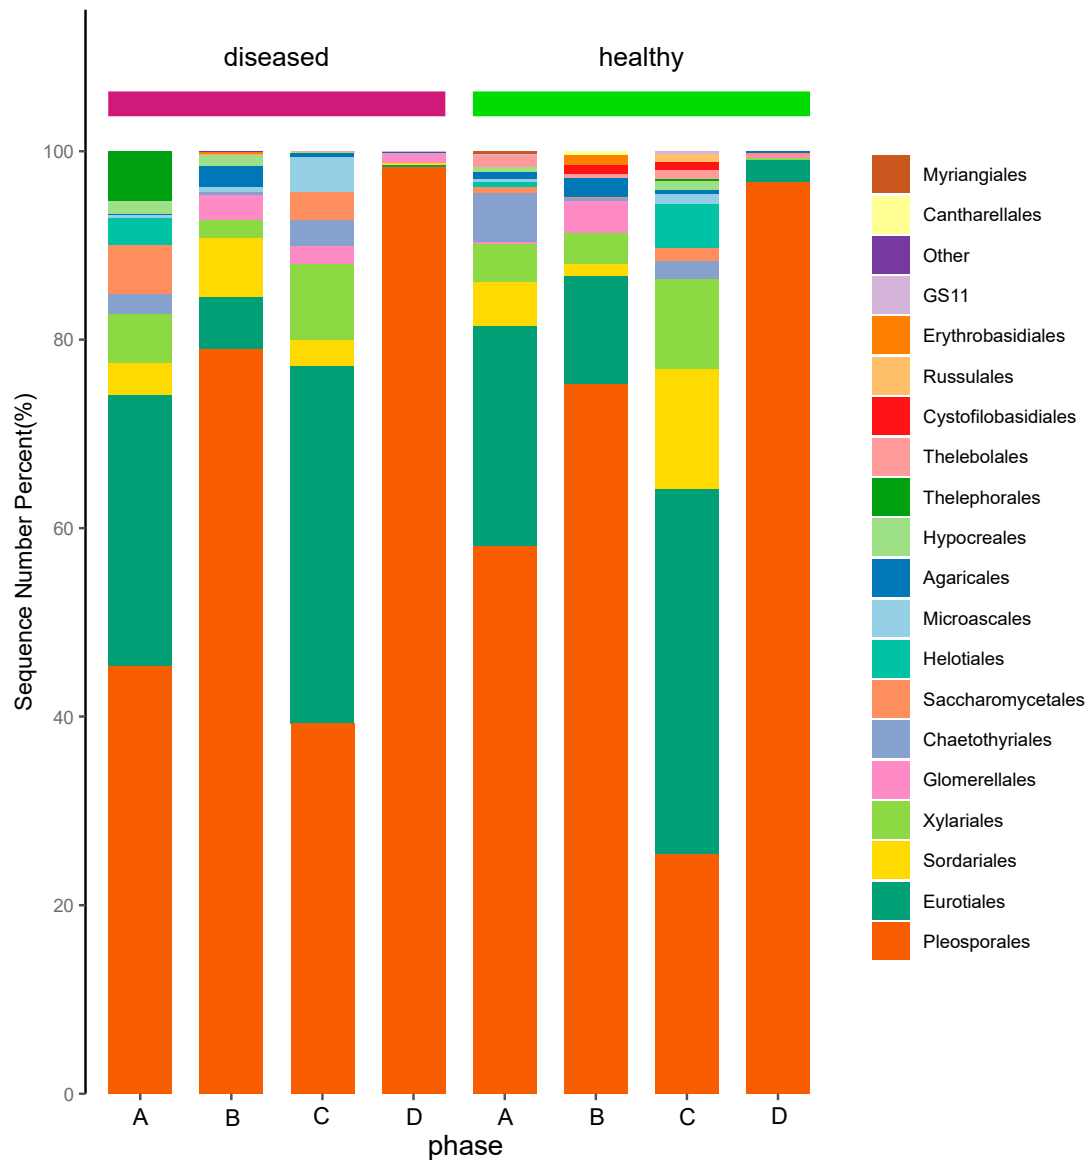

**Figure S8** LEfSe Analysis LDA Barplot for endophytic bacteria. Each horizontal bar represents a species, and the length of the bar corresponds to the LDA value. A higher LDA value indicates a larger difference. The color of the bar corresponds to which group the species is a biomarker for, indicating higher abundance of the biomarker in the corresponding group.

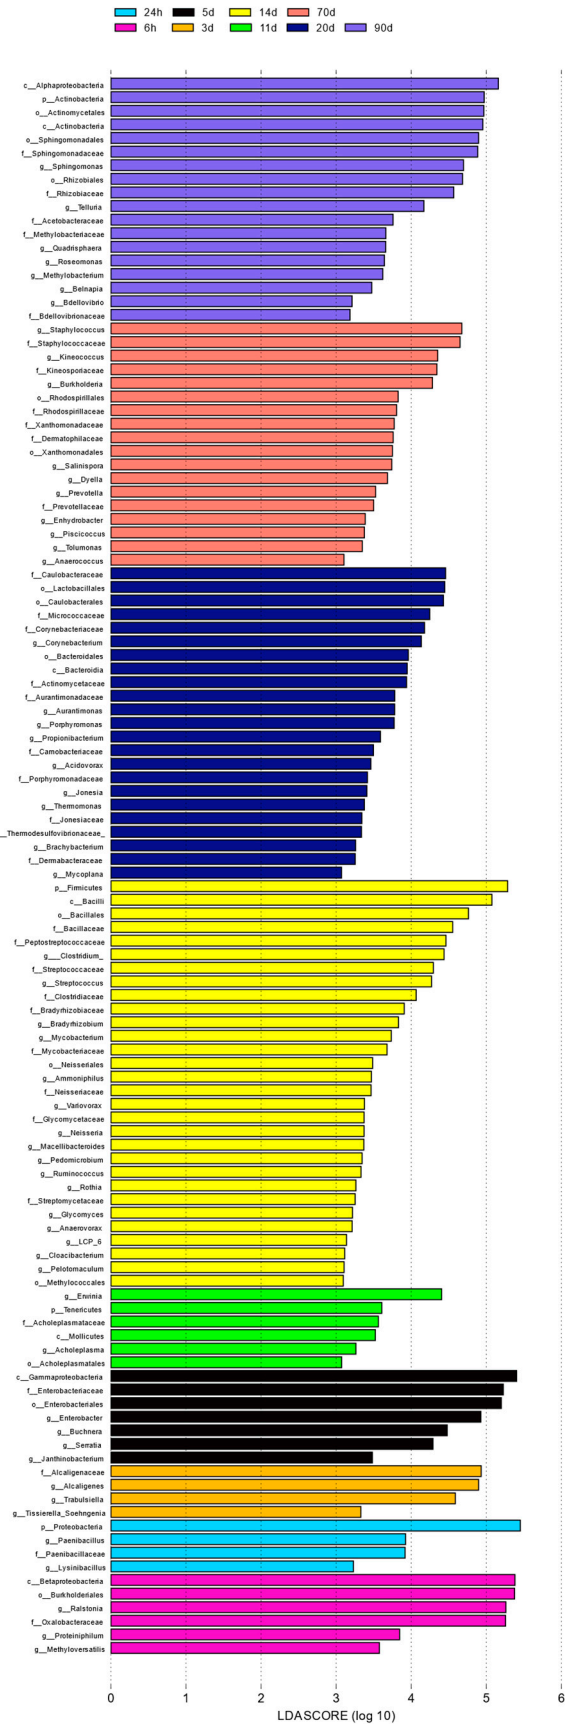

**Figure S9** LEfSe Analysis LDA Barplot for endophytic fungi. Each horizontal bar represents a species, and the length of the bar corresponds to the LDA value. A higher LDA value indicates a larger difference. The color of the bar corresponds to which group the species is a biomarker for, indicating higher abundance of the biomarker in the corresponding group.

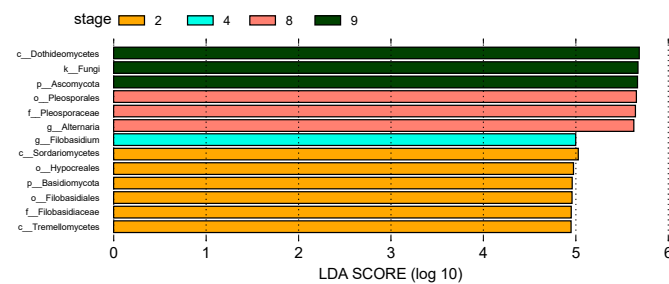

**Figure S10** Relevant parameters of endophytic bacteria community co-occurrence network at different stages.

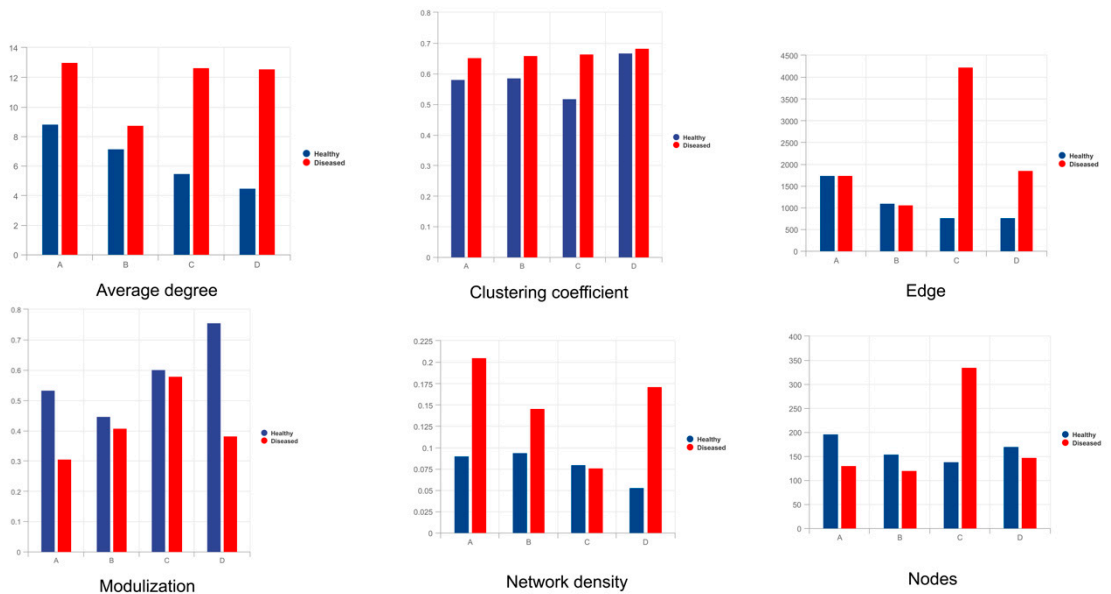

**Figure S11** Relevant parameters of endophytic fungi community co-occurrence network at different stages.

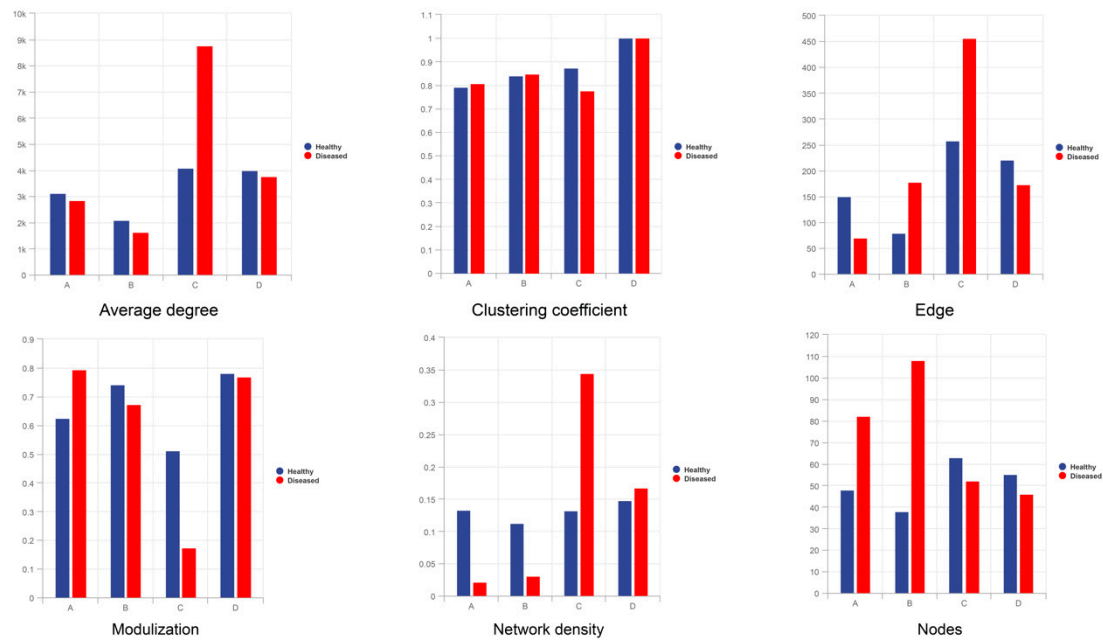

**Figure S12** The functional enrichment of endophytic bacterial and fungal sequences on MetaCyc pathway in healthy and diseased apple leaves was demonstrated by PCA analysis.

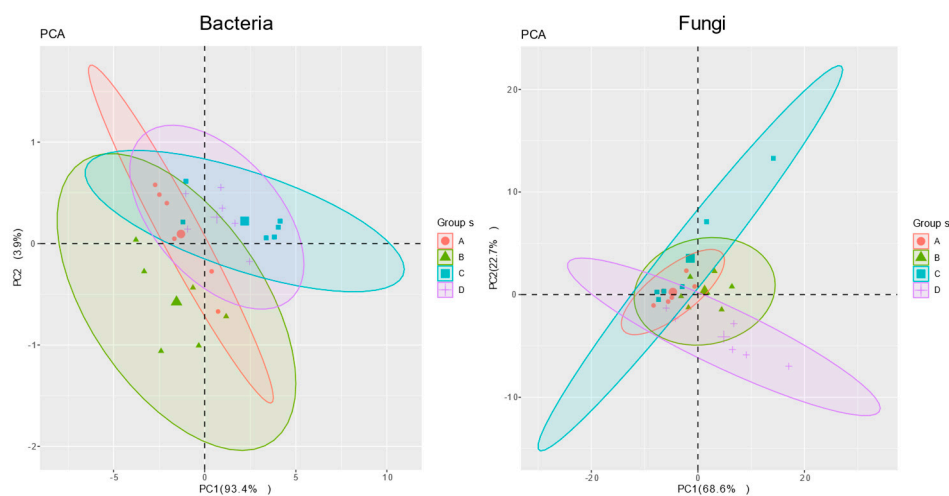

**Figure S13** Functional categories in which fungal community sequences are significantly enriched at various phases. Different letters indicate statistically significant differences among stages.

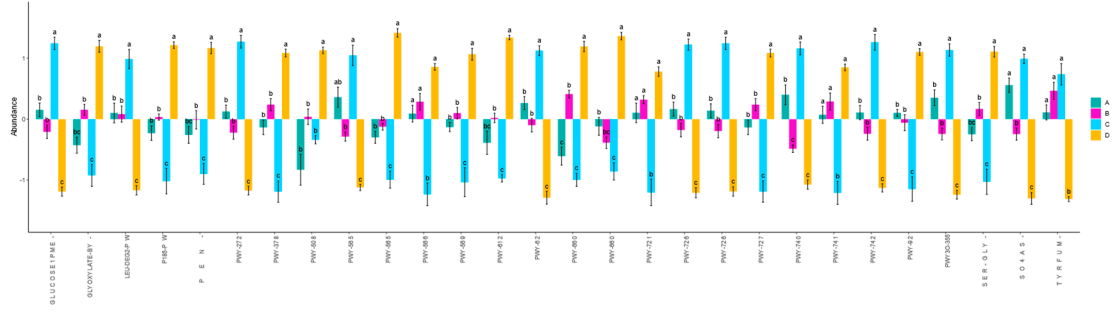

Supplement: s1 [file s1]
