# Supplementary material for: Time-Course Responses of Apple Leaf Endophytes to the Infection of Gymnosporangium yamadae
Source: MDPI journal article supplement (doi:10.3390/jof10020128), 2024-02-03
Supplement: s1 [file s1]

**For bacterial  
Primer Design**

| Sequencing region | Primer names | Primer sequence    |
|-------------------|--------------|--------------------|
| 799F_1193R        | 799F         | AACMGGATTAGATACCKG |
|                   | 1193R        | ACGTCATCCCCACCTTCC |

**PCR Amplification Conditions**

5×FastPfu Buffer ..... 4 µl  
 2.5 mM dNTPs ..... 2 µl  
 Forward Primer(5 µM) ..... 0.8 µl  
 Reverse Primer(5 µM) ..... 0.8 µl  
 FastPfu Polymerase ..... 0.4 µl  
 BSA ..... 0.2 µl  
 Template DNA ..... 10 ng

---

Add ddH<sub>2</sub>O to ..... 20 µl

**PCR Instrument:** ABI GeneAmp® 9700

**PCR reaction parameters:**

- 1× (3 minutes at 95°C)
  - Circular number × (30 seconds at 95°C; 30 seconds at Annealing temperature °C; 45 seconds at 72°C)
  - 10 minutes at 72°C, 10°C until halted by user
- Two rounds of amplification

Primer 1: 799F-1392R, annealing temperature 55°C, 27 cycles.

Primer 2: 799F-1193R, annealing temperature 55°C, 13 cycles.

**For fungi  
Primer Design**

| Sequencing region | Primer names | Primer sequence        |
|-------------------|--------------|------------------------|
| ITS1F_ITS2R       | ITS1F        | CTTGGTCATTTAGAGGAAGTAA |
|                   | ITS2R        | GCTGCGTTCTTCATCGATGC   |

**PCR Amplification Conditions**

5×FastPfu Buffer ..... 4 µl  
2.5 mM dNTPs ..... 2 µl  
Forward Primer(5 µM) ..... 0.8 µl  
Reverse Primer(5 µM) ..... 0.8 µl  
FastPfu Polymerase ..... 0.4 µl  
BSA ..... 0.2 µl  
Template DNA ..... 10 ng

---

Add ddH<sub>2</sub>O to ..... 20 µl

PCR Instrument: ABI GeneAmp® 9700

PCR reaction parameters:

- a. 1× (3 minutes at 95°C)
- b. Circular number × (30 seconds at 95°C; 30 seconds at Annealing temperature °C; 45 seconds at 72°C)
- c. 10 minutes at 72°C, 10°C until halted by user
